# Supplementary material
Source: Springer Nature journal article supplement (https://www.springermedizin.de/resource/supplementary/12880_2013_221_MOESM3_ESM.pdf/9450262)

left gastroepiploic artery

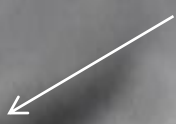

greater curvature vessel

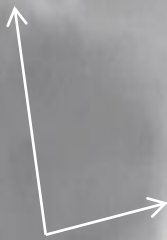

right gastroepiploic artery

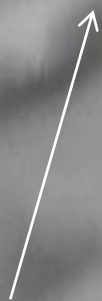

Supplement: MOESM3 [file 9450262]
